# Supplementary material for: Intestinal Lymphatic Endothelial Cells Produce R-Spondin3
Source: PubMed Central journal article supplement (PMC6048029; doi:10.1038/s41598-018-29100-7), 2018-07-16
Supplement: 41598_2018_29100_MOESM1_ESM.pdf [file 41598_2018_29100_MOESM1_ESM.pdf]

## **Supplemental Information**

### **Intestinal Lymphatic Endothelial Cells Produce R-Spondin3**

**Reiki Ogasawara, Daigo Hashimoto, Shunsuke Kimura, Eiko Hayase, Takahide Ara, Shuichiro Takahashi, Hiroyuki Ohigashi, Kosuke Yoshioka, Takahiro Tateno, Emi Yokoyama, Ko Ebata, Takeshi Kondo, Junichi Sugita, Masahiro Onozawa, Toshihiko Iwanaga, Takanori Teshima**

## Supplementary Legends

### **Supplementary Figure 1. R-Spo3 is the major R-Spo molecule produced in the intestine.**

Western blotting analyses to detect R-Spo1, R-Spo2, and R-Spo3 in the lysate of small intestine were performed as Fig. 1b. Images of full-length gel were taken with 1, 2, 3, or 5 minutes exposure time. rmR-Spo3 was used as a size control.

### **Supplementary Figure 2. Sorting strategies for LEC and VEC.**

Cells harvested from small intestine were labeled with fluorochrome-conjugated mAbs to CD45, CD90, and CD31. Doublets and dead cells were excluded as FSC-W<sup>high</sup> and DAPI<sup>+</sup> cells, respectively. Cells within the red gates were shown on the right of the original dot plots.

### **Supplementary Figure 3. Immunofluorescent staining of lymphatic vessels in the small intestine after SCT.**

Mice were transplanted as in Fig. 5, and the small intestines were harvested on day +14 after transplantation. **(a)** Immunofluorescent images of Lyve-1 (green) with DAPI nuclear staining (blue) were shown. Bar, 100  $\mu$ m. **(b)** LECs were enumerated using flow cytometry on days +14 and +28 after syngeneic SCT and on days +7, +14, and +28 after allogeneic SCT (Allo). Data from two independent experiments were combined and shown as means  $\pm$  SE (n = 5-8 / group).

\*P<0.05, \*\*P<0.01.

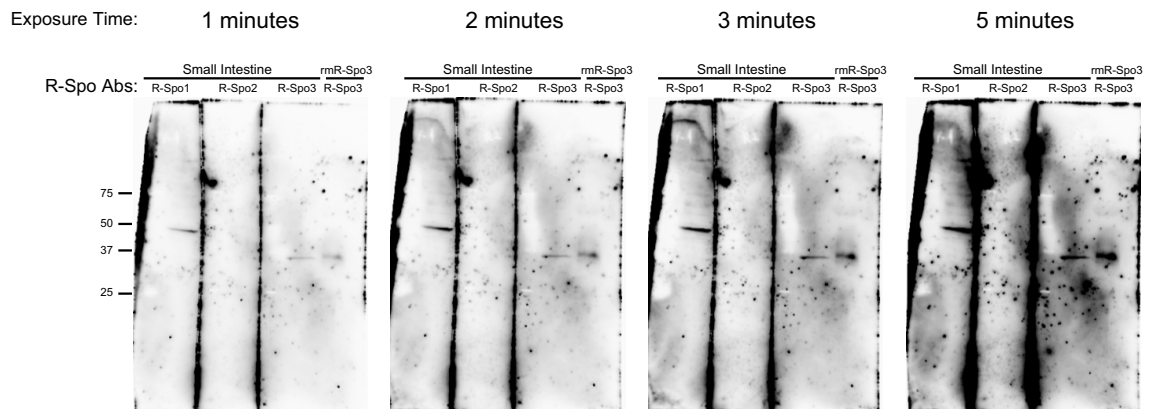

**Supplementary Figure 1.**  
**Ogasawara, et al.**

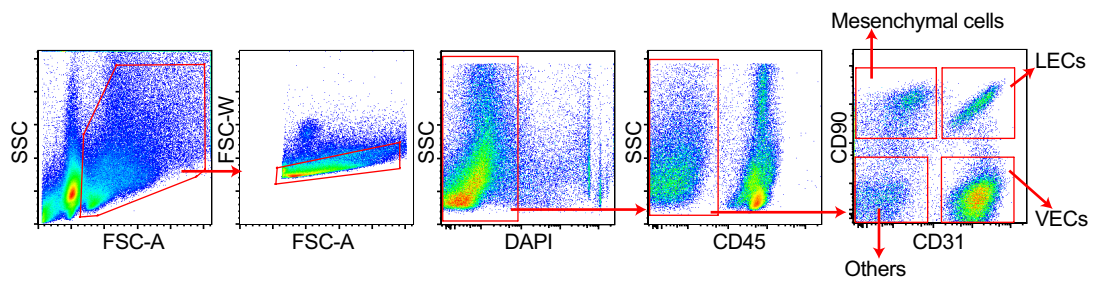

**Supplementary Figure 2.**

**Ogasawara, et al.**

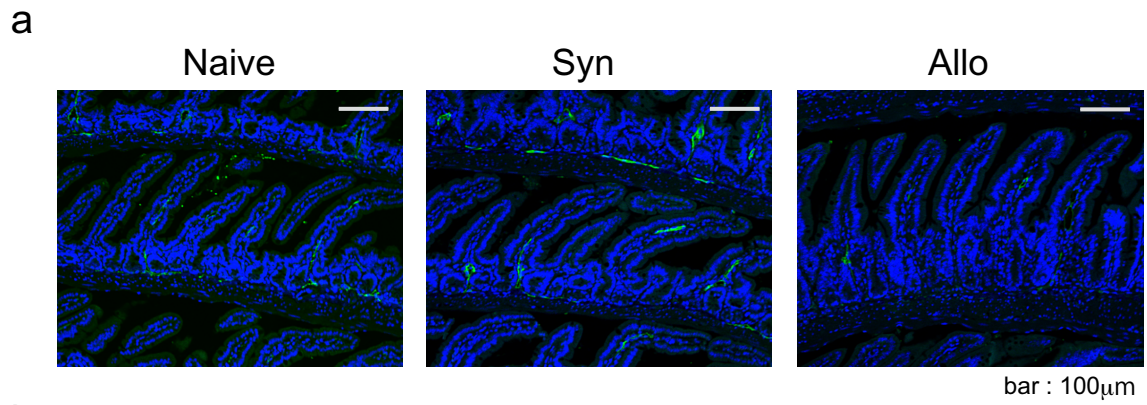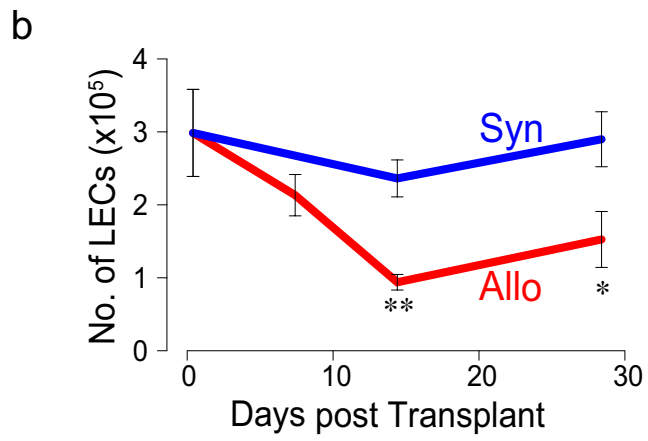

Supplementary Figure 3.  
Ogasawara, et al.

**Supplementary Table 1. List of primary antibodies used in immunofluorescent studies, flow cytometry, and Western blotting**

| Target Ag                 | Clone       | Conjugate   | Supplier      | Catalog#   |
|---------------------------|-------------|-------------|---------------|------------|
| <b>Flow cytometry</b>     |             |             |               |            |
| CD45                      | 30-F11      | APC-Cy7     | BD Bioscience | 557659     |
| CD90.2                    | 53-2.1      | PerCP/Cy5.5 | Biolegend     | 140322     |
| CD31                      | 390         | PE-Cy7      | eBioscience   | 25-0311-82 |
| I-A/I-E                   | M5/114.15.2 | FITC        | Biolegend     | 107606     |
| CD4                       | GK1.5       | PE          | BD Pharmingen | 553730     |
| CD8                       | 53-6.7      | PE          | BD Bioscience | 553033     |
| F4/80                     | BM8         | FITC        | Biolegend     | 123108     |
| CD11b                     | M1/70       | FITC        | BD Pharmingen | 01714D     |
| CD11c                     | HL3         | FITC        | BD Pharmingen | 553801     |
| CD103                     | 2E7         | PE          | BioLegend     | 121406     |
| Ly6C/Ly6G                 | RB6-8C5     | FITC        | BD Bioscience | 553127     |
| E-Cadherin                | DECMA-1     | PE          | BioLegend     | 147304     |
| Tie2                      | TEK4        | Biotin      | BioLegend     | 124006     |
| Lyve-1                    | polyclonal  | purified    | AngioBio      | 11-034     |
| Podoplanin                | 8.1.1       | PE          | BioLegend     | 127408     |
| <b>Immunofluorescence</b> |             |             |               |            |
| Lyve-1                    | polyclonal  | purified    | AngioBio      | 11-034     |
| R-Spo3                    | # 400403    | purified    | R&D systems   | MAB41201   |
| <b>Western blotting</b>   |             |             |               |            |
| R-Spo1                    | polyclonal  | purified    | abcam         | ab106556   |
| R-Spo2                    | polyclonal  | purified    | abcam         | ab73761    |
| R-Spo3                    | polyclonal  | purified    | abcam         | ab171010   |
| R-Spo3                    | polyclonal  | purified    | abcam         | ab109808   |
| $\beta$ -actin            | AC1-20.4.2  | purified    | Sigma-Aldrich | A9357      |
